# Supplementary material
Source: PubMed Central journal article supplement (PMC3431040)
Supplement: tlo0504_0297SD1.pdf [file tlo0504_0297SD1.pdf]

**Table W1.** Eighteen Genes of the Initial IFN Signature.

| Gene Symbol    | Represented and Functional in Thompson and Fattet Data Sets | Part of the Med-IFN Core Signature |
|----------------|-------------------------------------------------------------|------------------------------------|
| <i>CCR2</i>    | No                                                          | No                                 |
| <i>CXCL10</i>  | Yes                                                         | Yes                                |
| <i>FCGR1A</i>  | No                                                          | No                                 |
| <i>IFI27</i>   | Yes                                                         | Yes                                |
| <i>IFI44</i>   | Yes                                                         | No                                 |
| <i>IFIT1</i>   | Yes                                                         | Yes                                |
| <i>IFIT2</i>   | Yes                                                         | Yes                                |
| <i>IFIT3</i>   | Yes                                                         | Yes                                |
| <i>IFIT5</i>   | Yes                                                         | No                                 |
| <i>MX1</i>     | Yes                                                         | Yes                                |
| <i>MX2</i>     | Yes                                                         | Yes                                |
| <i>OAS1</i>    | Yes                                                         | Yes                                |
| <i>OAS2</i>    | Yes                                                         | Yes                                |
| <i>OAS3</i>    | Yes                                                         | No                                 |
| <i>OASL</i>    | Yes                                                         | No                                 |
| <i>SOCS1</i>   | Yes                                                         | No                                 |
| <i>STAT1</i>   | Yes                                                         | Yes                                |
| <i>TNFSF10</i> | Yes                                                         | No                                 |

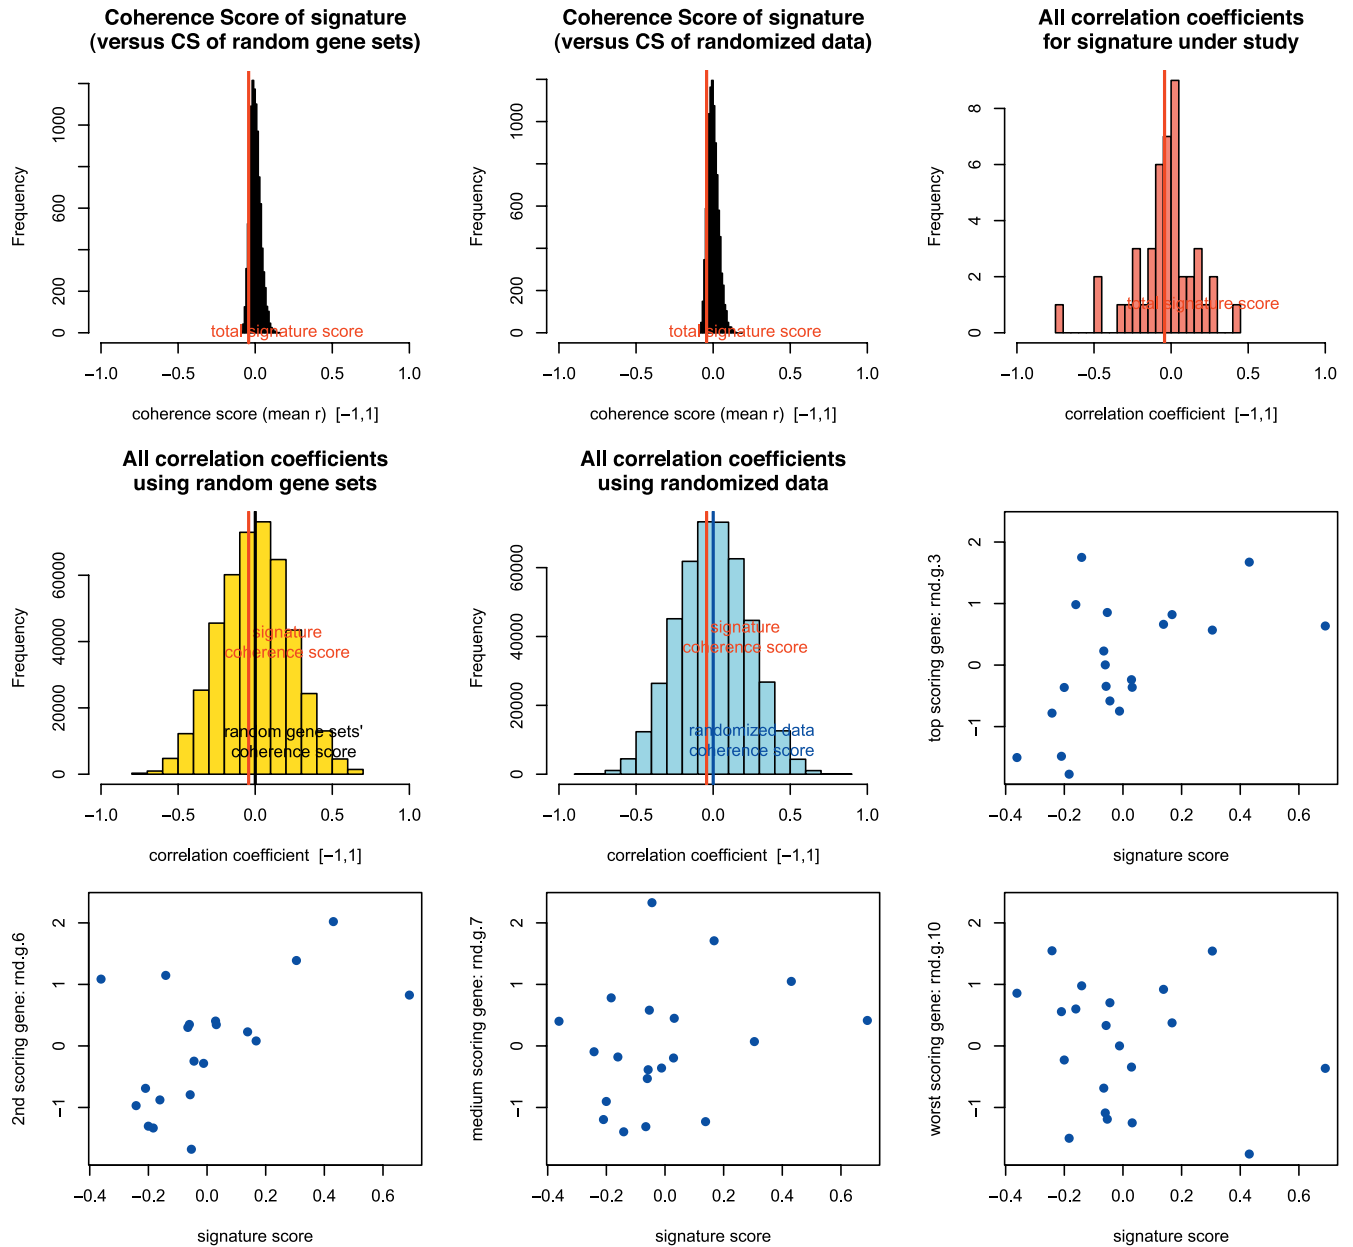

**Figure W1.** Diagnostic plots of the coherence scores for the simulated nonregulated (random), weakly regulated, and strongly regulated signature shown in Figure 1.

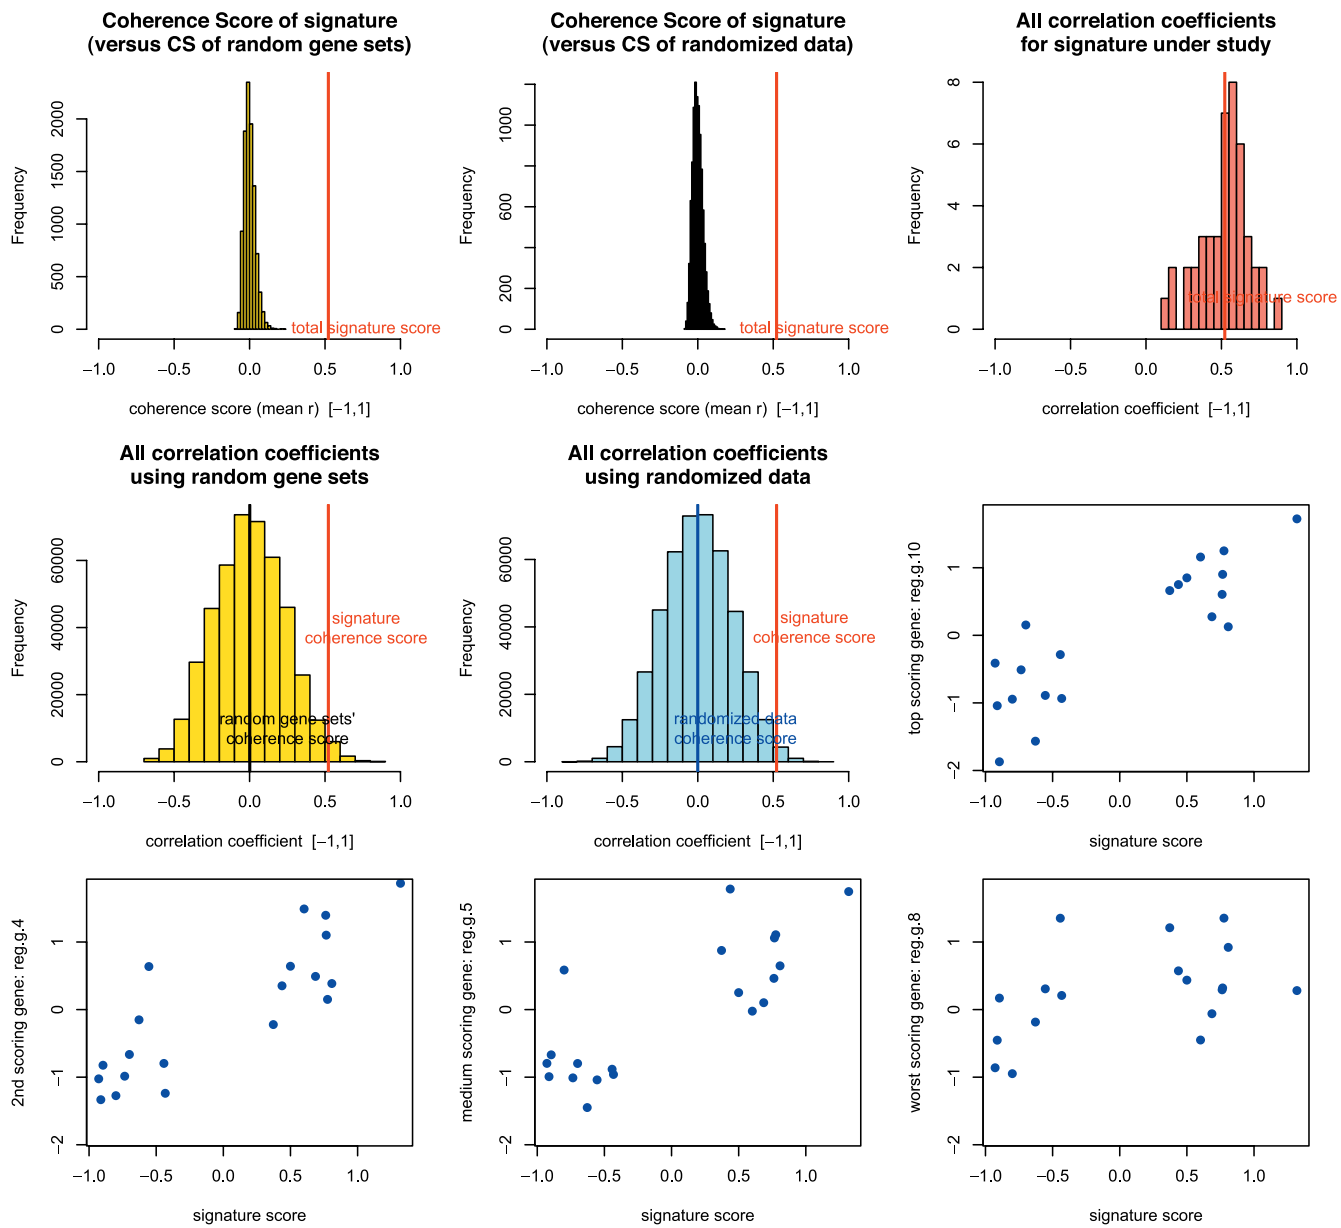

Figure W1. (continued).

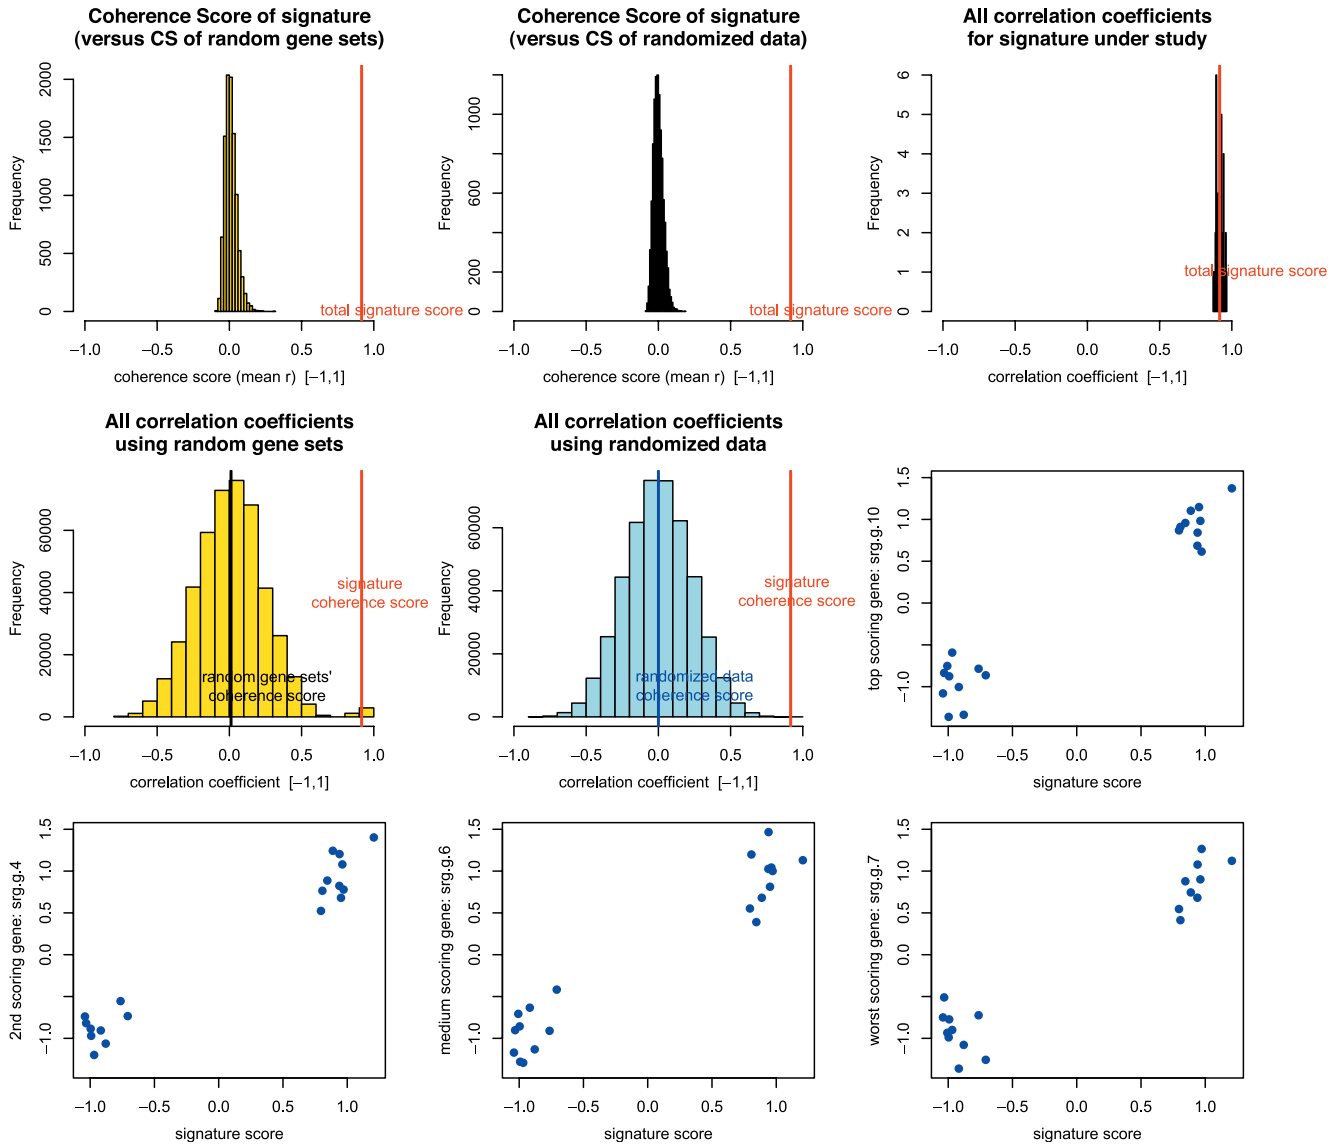

Figure W1. (continued).

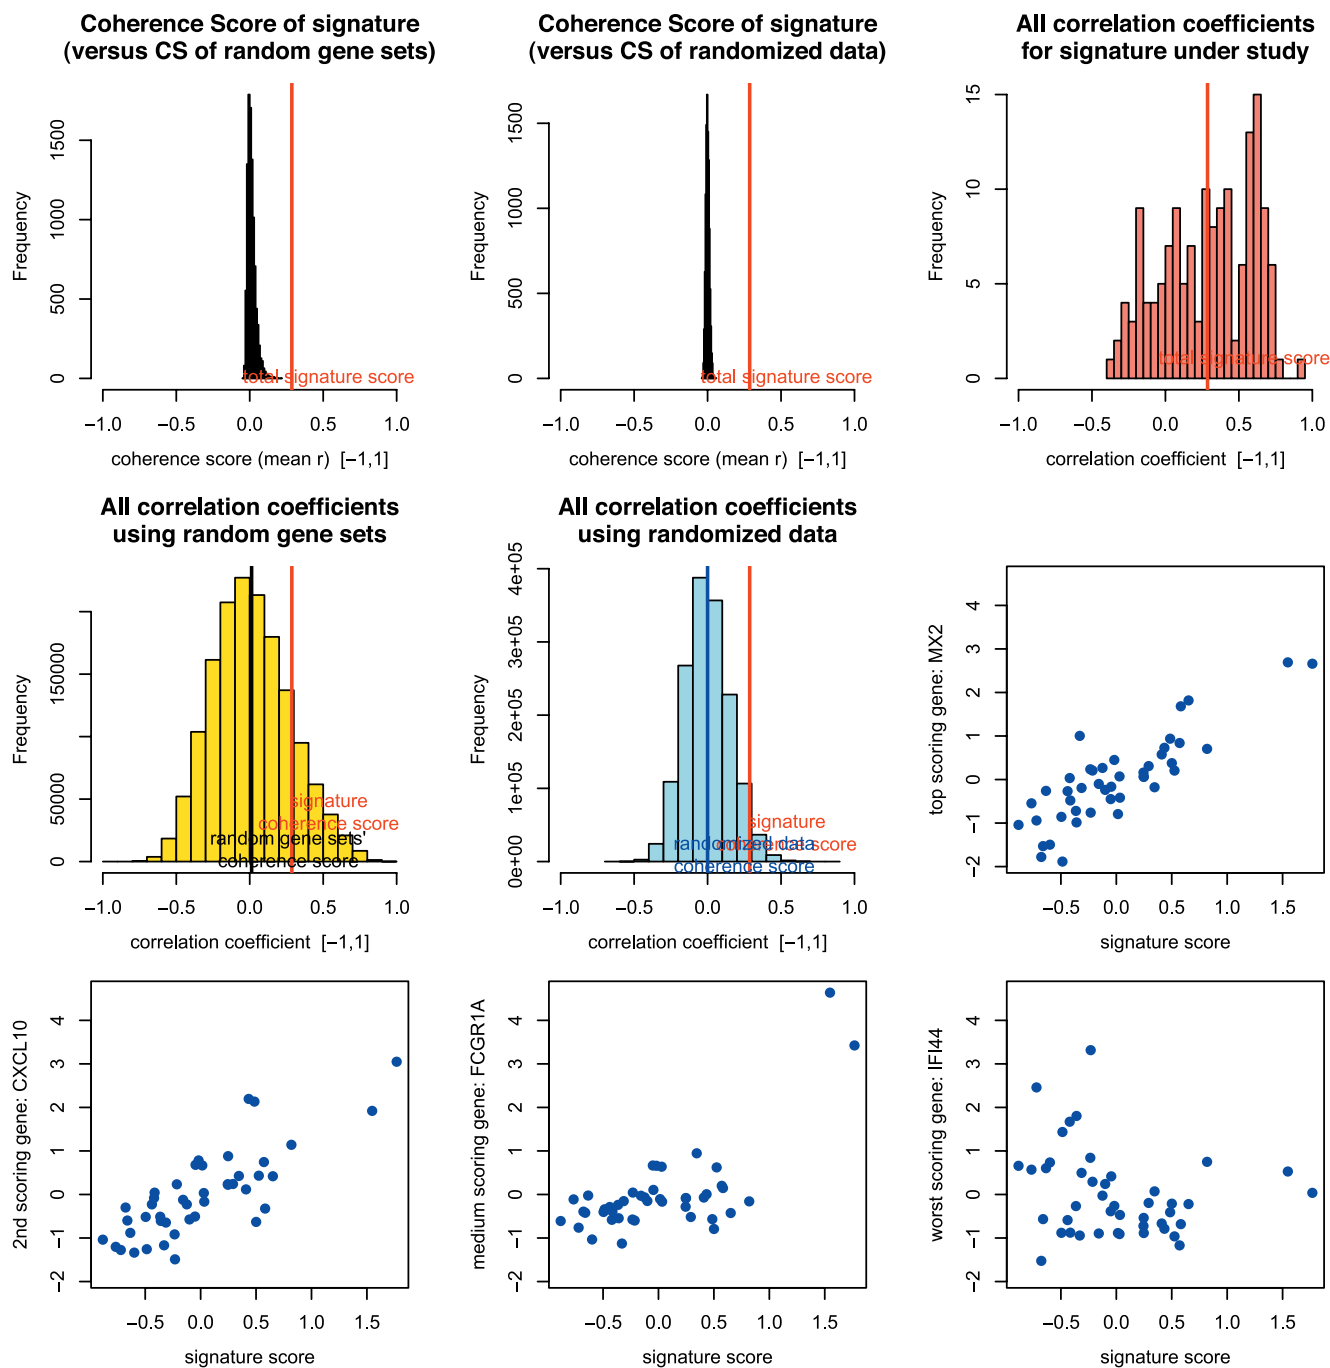

**Figure W2.** Coherence score: diagnostic plots for the initial IFN signature in Thompson data set.

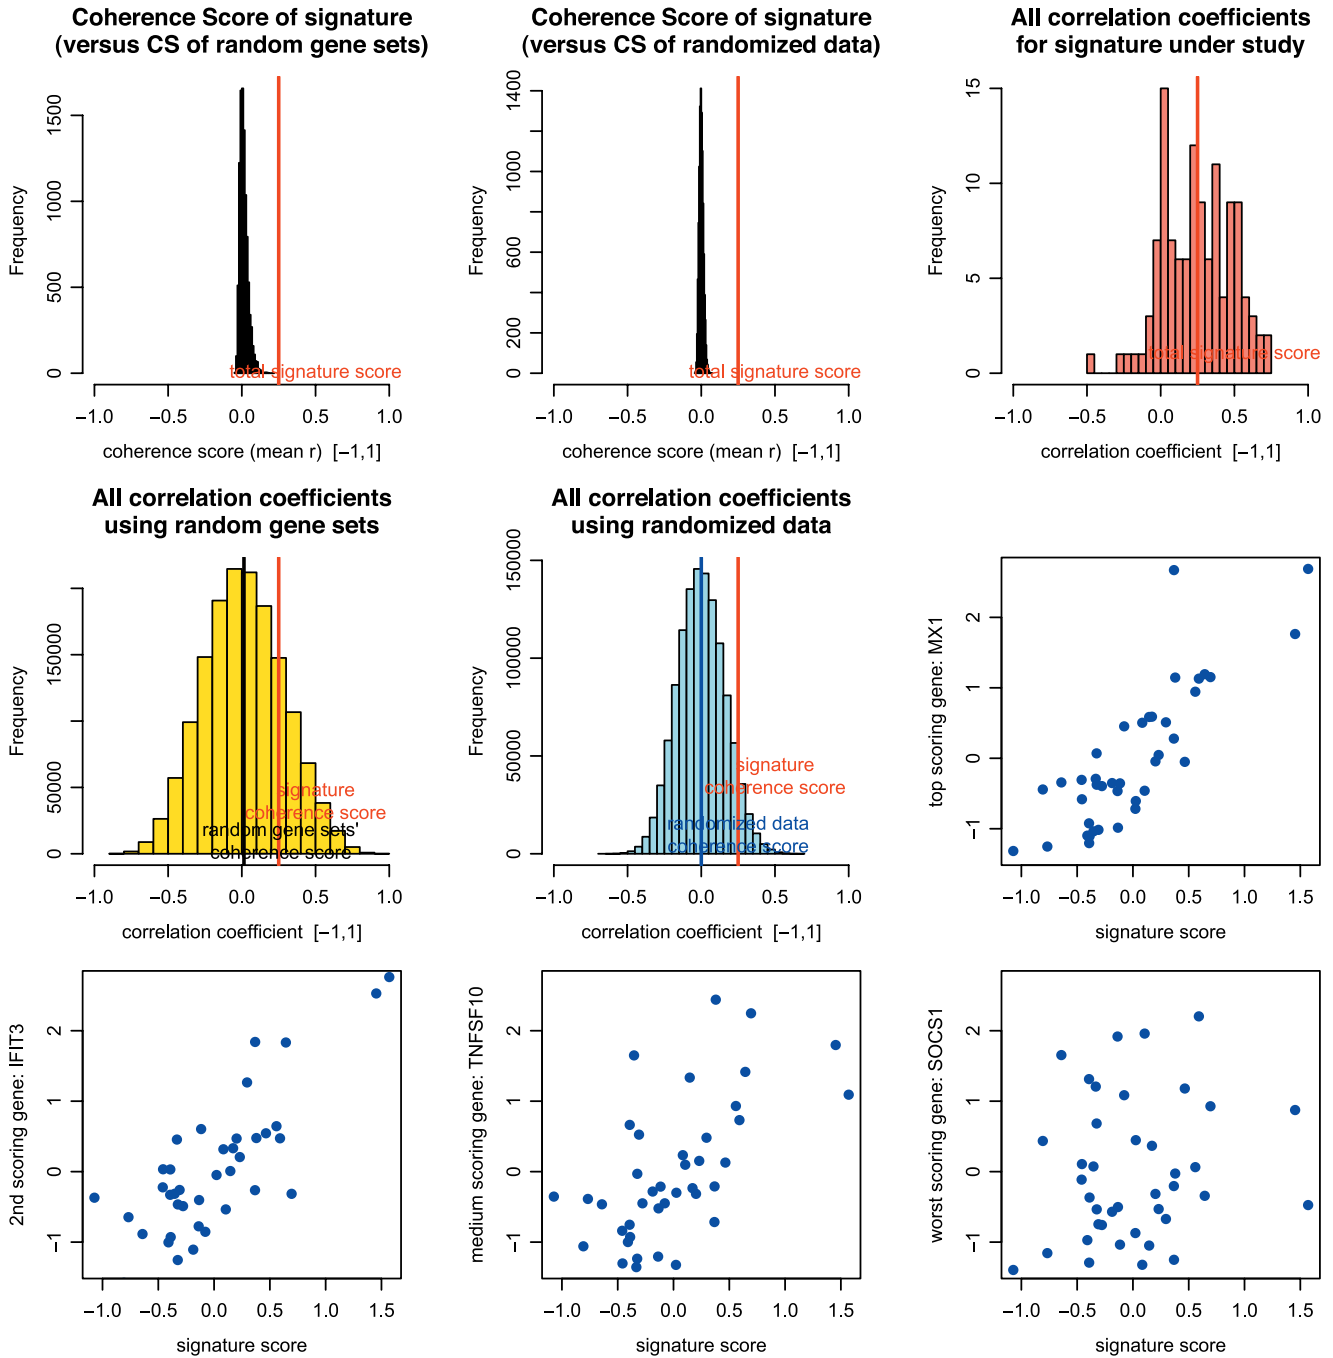

**Figure W3.** Coherence score: diagnostic plots for the initial IFN signature in Fattat data set.
